# Supplementary material for: Structural engineering of BiOBr nanosheets for boosted photodegradation performance toward rhodamine B
Source: Royal Society of Chemistry journal article supplement (doi:10.1039/d2ra00375a), 2022-01-01
Supplement: d2ra00375a1.pdf [file d2ra00375a1.pdf]

## Supporting Information

### Structural engineering of ultrathin BiOBr nanosheets for boosted photodegradation performance toward Rhodamine B

Yu Qi #, Jinjiang Zhao #, Hongtao Wang#, Meifang Yan #, Tianyu Guo\*<sup>#§</sup>

# College of Environment Science and Engineering, Taiyuan University of Technology, No.209 University Street, Jinzhong 030600, Shanxi, PR China.

§ Shanxi Key Laboratory of Gas Energy Efficient and Clean Utilization, No.79 Yingze west street, Taiyuan 030024, Shanxi, PR China.

E-mail: tyguo1117x@163.com

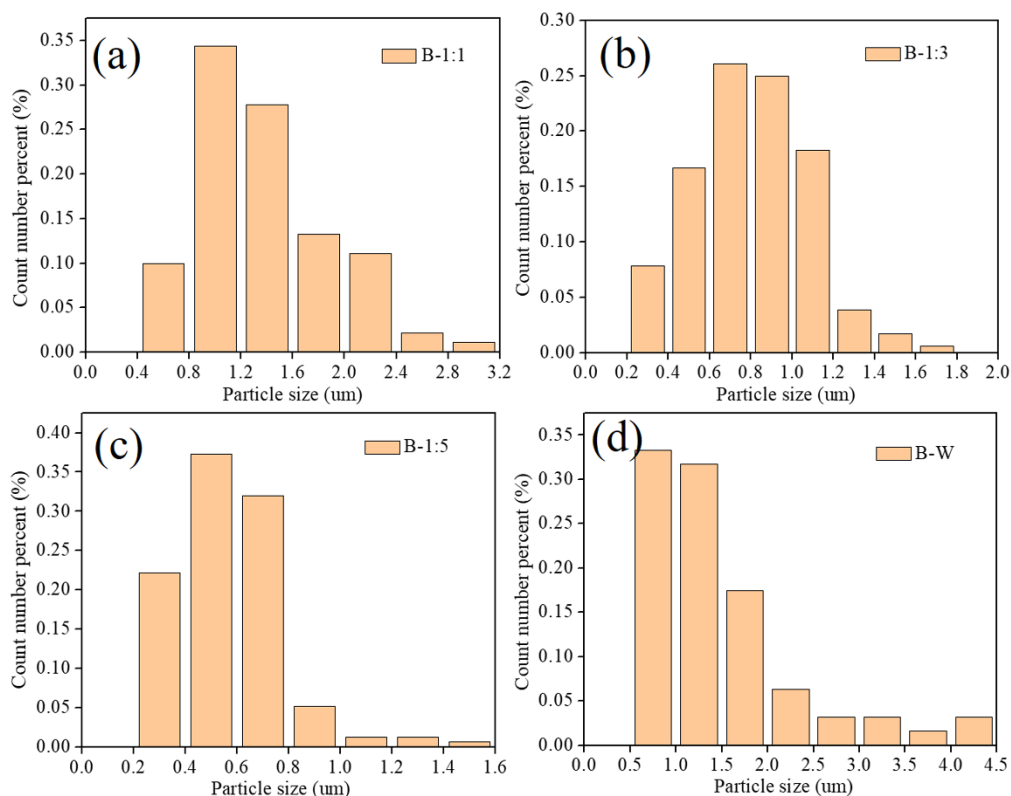

Fig. S1. The particle size distribution of the as-prepared BiOBr samples.

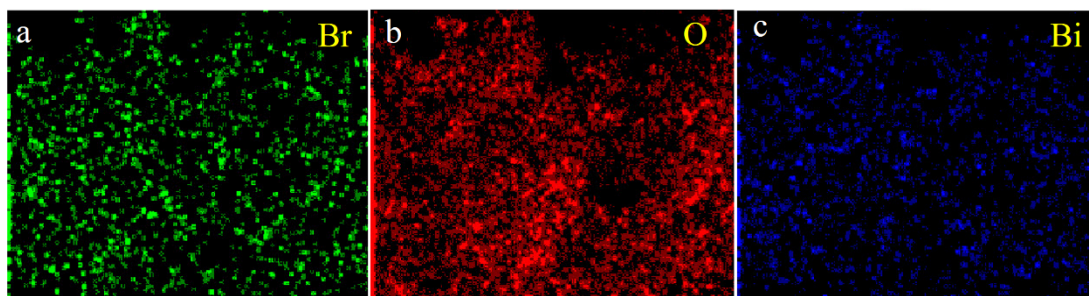

Fig. S2 EDS elemental mapping of different elements in B-1:3 sample.

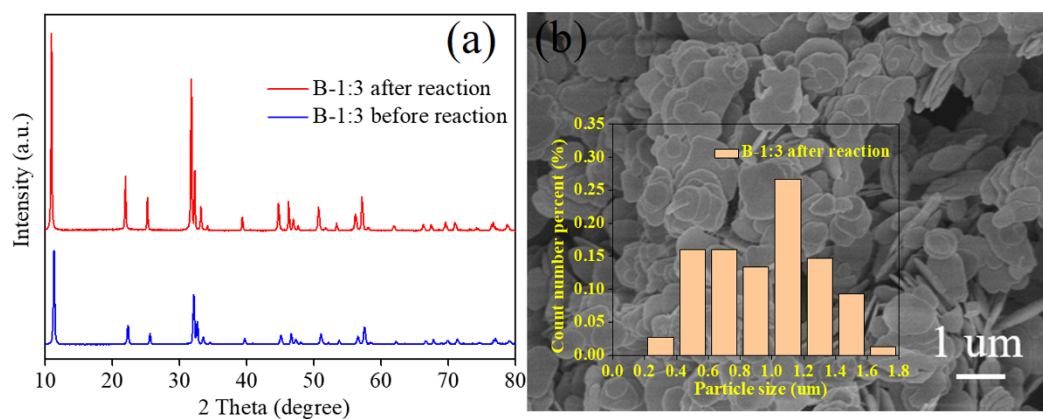

Fig. S3 The XRD patterns of B-1:3 before and after reaction (a), the SEM image (b) and particle size distribution (inserted in Fig. S3b) of B-1:3 after reaction.

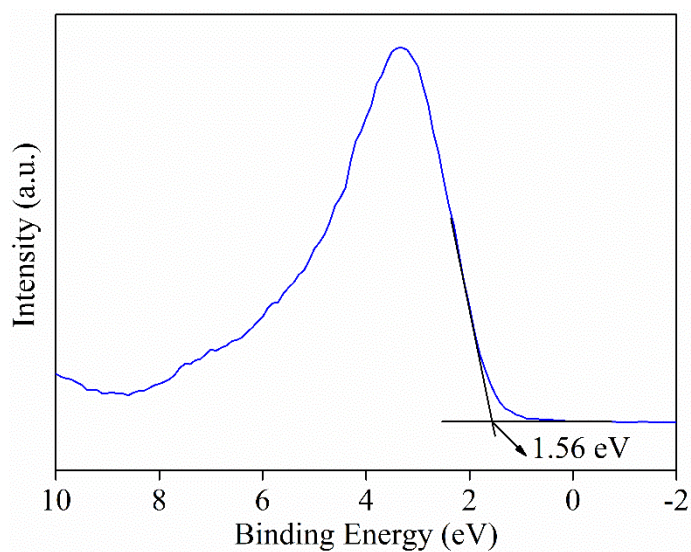

Fig. S4 The valence band XPS spectrum for B-1:3.

Table S1 The photoactivity comparisons toward RhB about BiOBr and BiOBr-based photocatalysts

| Catalysts              | Light source | Concentration (mg/L) | Volume (mL) | Quality (mg) | Irradiation time (min) | Degradation rate (%) | Ref. |
|------------------------|--------------|----------------------|-------------|--------------|------------------------|----------------------|------|
| 7%BiSbO <sub>4</sub> / | Visible      | 10                   | 100         | 30           | 45                     | 96                   | [1]  |

|                                       |         |    |     |    |     |      |     |      |
|---------------------------------------|---------|----|-----|----|-----|------|-----|------|
| BiOBr                                 | light   |    |     |    |     |      |     |      |
| BiOBr/BiO                             | Visible | 20 | 50  | 20 | 120 | 99.4 | [2] |      |
| Ac <sub>1-0.8</sub> Br <sub>0.8</sub> | light   |    |     |    |     |      |     |      |
| BiOBr <sub>x</sub> I <sub>1-x</sub> / | Visible | 20 | 100 | 50 | 120 | 80   | [3] |      |
| BiOBr                                 | light   |    |     |    |     |      |     |      |
| BiOBr/Bi <sub>24</sub>                | Visible | 10 | 100 | 50 | 60  | 92.4 | [4] |      |
| O <sub>31</sub> Br <sub>10</sub>      | light   |    |     |    |     |      |     |      |
| Bi@BiOBr                              | Visible | 10 | 50  | 10 | 120 | 98.2 | [5] |      |
|                                       | light   |    |     |    |     |      |     |      |
| S-doped                               | Visible | 20 | 100 | 50 | 50  | 100  | [6] |      |
| BiOBr                                 | light   |    |     |    |     |      |     |      |
| BiOBr                                 | Visible | 20 | 100 | 40 | 30  | 97   |     | This |
|                                       | light   |    |     |    |     |      |     | work |

## References

1. Z. Wang, K. Wang, Y. Li, L. Jiang and G. Zhang, *Applied Surface Science*, 2019, **498**, 143850.
2. X. Jia, Q. Han, H. Liu, S. Li and H. Bi, *Chemical Engineering Journal*, 2020, **399**, 125701.
3. Y. Bai, X. Shi, P.Q. Wang, L. Wang, K. Zhang, Y. Zhou, H.Q. Xie, J.N. Wang and L.Q. Ye, *Chemical Engineering Journal*, 2019, **356**, 34-42.
4. G.H. Huang, Z.S. Li, K. Liu, X.K. Tang, J. Huang and G.F. Zhang, *Catalysis Science Technology*, 2020, **10**, 4645-4654.
5. C. Hua, X. Dong, Y. Wang, N. Zheng, H. Ma and X. Zhang, *Journal of materials science*, 2019, **54**, 9397-9413.
6. M. Huang, J. Li, W. Su, X. Huang, B. Li, M. Fan, L. Dong and H. He, *CrystEngComm*, 2020, **22**, 7684-7692.
